# Supplementary material
Source: Research Square preprint supplement (doi:10.21203/rs.3.rs-9168824/v1)
Supplement: Supplementary file 1 [file 724b9b0c1eff843ce74d8e1c.docx]

Supplementary

Transmission dynamic of respiratory multi-pathogen co-infection in a Chinese megacity: A modelling study based on Wuhan Big Data Center

Jiahui Li et al.

Correspondence: Tianmu Chen, chentianmu@xmu.edu.cn.

**This file includes:**

Figures S1 to S4

Tables S1 to S4

SI References 1-3

**Model Fitting Parameters and Goodness-of-Fit**

**Table S1. The mean of the fitting parameters in** **different single-pathogen infections. (Week-1)**

| **Single-pathogen** | **Mean of** | **Mean of** | **Mean Generation Interval** | **Generation Interval Variance** |
| --- | --- | --- | --- | --- |
| AdV | 1.54e-03 | 1.13e-02 | 2.66 | 1.39 |
| CoxsV | 2.22e-03 | 6.00e-02 | 2.52 | 1.22 |
| Cpn | 1.16e-03 | 6.35e-02 | 2.74 | 1.47 |
| Flu_A | 1.47e-03 | 1.22e-02 | 2.27 | 1.04 |
| Flu_B | 2.23e-03 | 1.18e-01 | 2.60 | 1.32 |
| HPIVs | 2.23e-03 | 6.33e-02 | 2.64 | 1.36 |
| Mp | 2.93e-03 | 6.40e-02 | 2.69 | 1.42 |
| RSV | 3.63e-05 | 5.87e-02 | 2.62 | 1.34 |
| RhV | 5.30e-06 | 6.15e-02 | 2.59 | 1.31 |
| SARS-CoV-2 | 4.46e-03 | 1.39e-02 | 2.45 | 1.25 |

**Table S2. The R² and P-value comparing the fitted curve to the actual data** **in different single-pathogen infections.**

| **Pathogen** | **R2** | **P-value** |
| --- | --- | --- |
| AdV | 0.8794 | <0.0001 |
| CoxsV | 0.8032 | <0.0001 |
| Cpn | 0.9006 | <0.0001 |
| Flu_A | 0.8478 | <0.0001 |
| Flu_B | 0.9694 | <0.0001 |
| HPIVs | 0.8725 | <0.0001 |
| Mp | 0.9100 | <0.0001 |
| RSV | 0.8616 | <0.0001 |
| RhV | 0.8220 | <0.0001 |
| SARS-CoV-2 | 0.7103 | <0.0001 |

**Table S3. The mean of the fitting parameters in different dual-pathogen coinfections. (Week-1)**

| **Dual-pathogen** | **Mean of** | **Mean of** | **Mean of** | **Mean of** | **Mean of** | **Mean of** | **Mean Generation Interval** | **Generation Interval Variance** |
| --- | --- | --- | --- | --- | --- | --- | --- | --- |
| AdV+Mp | 2.24e-03 | 4.00e-02 | 0.2359 | 0.0732 | 2.4890 | 0.3386 | 2.55 | 1.29 |
| AdV+RhV | 1.45e-03 | 3.27e-02 | 0.1446 | 0.1449 | 0.9982 | 0.2783 | 2.67 | 1.39 |
| AdV+RSV | 5.57e-04 | 2.27e-02 | 0.7185 | 0.2537 | 0.6878 | 1.0401 | 2.62 | 1.38 |
| CoxsV+Mp | 1.67e-03 | 4.82e-02 | 0.0103 | 0.0109 | 0.9890 | 0.1851 | 2.62 | 1.34 |
| Cpn+Mp | 2.22e-03 | 3.45e-02 | 0.3004 | 0.3015 | 0.9088 | 0.9639 | 3.23 | 1.60 |
| Flu_A+Flu_B | 3.34e-03 | 5.06e-02 | 0.0825 | 0.0825 | 3.4428 | 0.0825 | 2.60 | 1.32 |
| Flu_A+Mp | 2.86e-03 | 4.83e-02 | 0.1711 | 0.1715 | 2.4349 | 0.3413 | 2.38 | 1.10 |
| Flu_A+SARS-CoV-2 | 2.73e-03 | 5.60e-02 | 0.1037 | 0.0952 | 1.8676 | 1.8189 | 2.22 | 1.03 |
| Flu_B+Mp | 4.76e-05 | 9.74e-02 | 0.1020 | 0.1020 | 0.4075 | 0.4075 | 2.61 | 1.33 |
| HPIVs+Mp | 1.11e-03 | 3.99e-02 | 0.0552 | 0.0553 | 0.2284 | 0.2243 | 2.59 | 1.32 |
| RSV+Mp | 1.01e-03 | 2.63e-02 | 0.1356 | 0.2410 | 0.7684 | 0.8826 | 2.68 | 1.41 |
| RhV+Mp | 1.51e-03 | 2.23e-02 | 0.1983 | 0.1379 | 0.2769 | 1.0228 | 2.54 | 1.27 |
| SARS-CoV-2+Mp | 2.70e-03 | 3.29e-02 | 0.1981 | 0.0383 | 0.5660 | 0.6160 | 3.71 | 2.14 |

**Table S4. The R² and P-value of the fitted curve compared to the actual data in different dual-pathogen coinfections.**

| **Pathogen** | **R2** | **P-value** |
| --- | --- | --- |
| AdV+Mp | 0.6051 | <0.0001 |
| AdV+RhV | 0.3708 | <0.0001 |
| AdV+RSV | 0.3039 | <0.0001 |
| CoxsV+Mp | 0.6976 | <0.0001 |
| Cpn+Mp | 0.7917 | <0.0001 |
| Flu_A+Flu_B | 0.7162 | <0.0001 |
| Flu_A+Mp | 0.4926 | <0.0001 |
| Flu_A+SARS-CoV-2 | 0.2911 | <0.0001 |
| Flu_B+Mp | 0.9210 | <0.0001 |
| HPIVs+Mp | 0.6740 | <0.0001 |
| RSV+Mp | 0.8562 | <0.0001 |
| RhV+Mp | 0.5251 | <0.0001 |
| SARS-CoV-2+Mp | 0.7507 | <0.0001 |

**Parameter Sensitivity Analysis**

The sensitivity index (*1*) is an important indicator for quantifying the sensitivity of model variables to parameter changes. If the partial derivative of variable with respect to parameter exists, then the sensitivity index of this variable with respect to parameter is

According to the definition of the sensitivity index, a sensitivity analysis of the model's basic reproduction number and its related parameters was conducted using latin hypercube sampling combined (LHS) with the partial rank correlation coefficient (PRCC) method, with the results shown in Fig. S1. This method employs a hierarchical random sampling strategy to ensure efficient exploration of the parameter space and utilizes PRCC to quantitatively assess the nonlinear dependency between parameters and (*2-3*). The magnitude of the absolute value of PRCC indicates the strength of the influence, while the sign indicates a positive or negative mechanism of action.


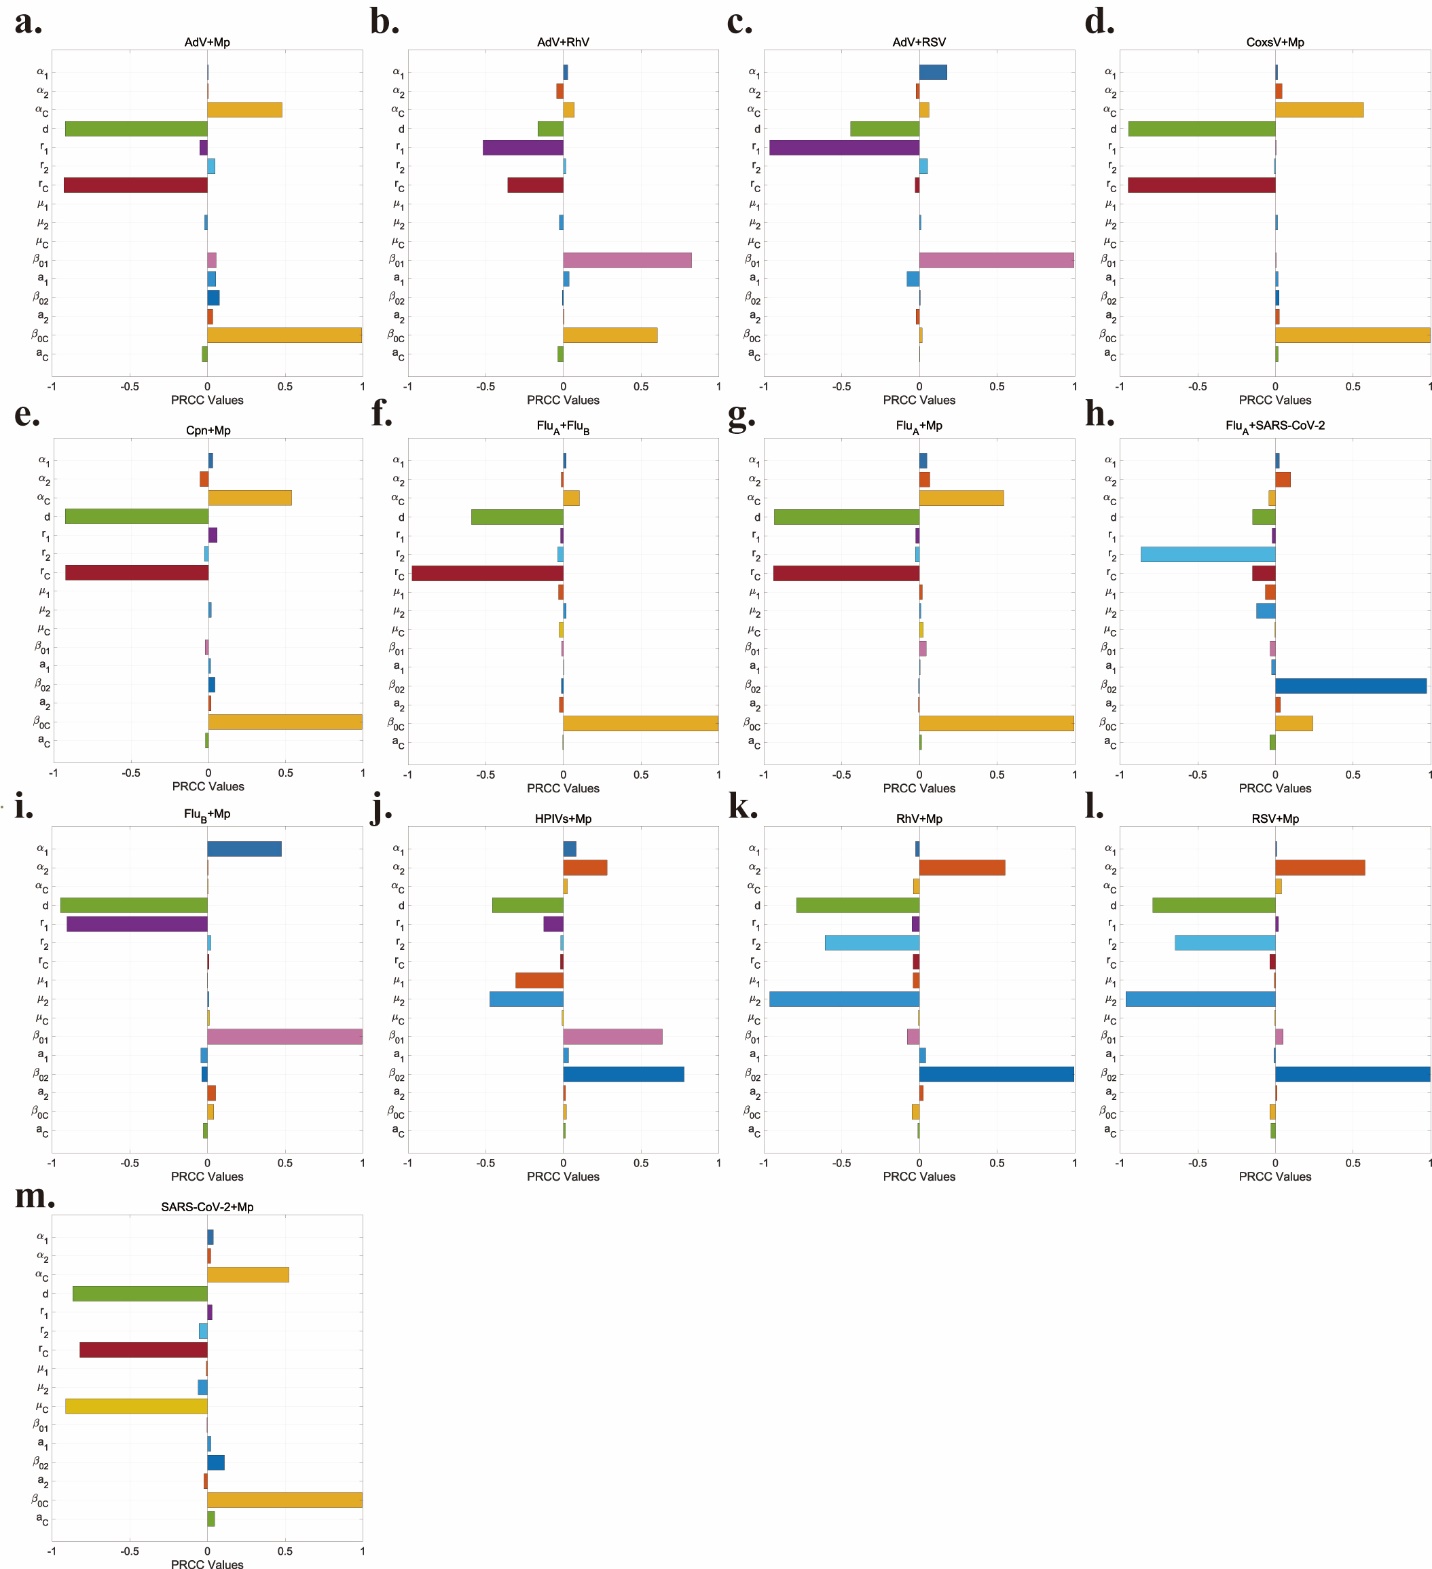


**Fig. S1 Sensitivity plot of the basic reproduction number .**

**Time‑dependent Reproduction Numbers for Single and Co‑infecting Pathogens**


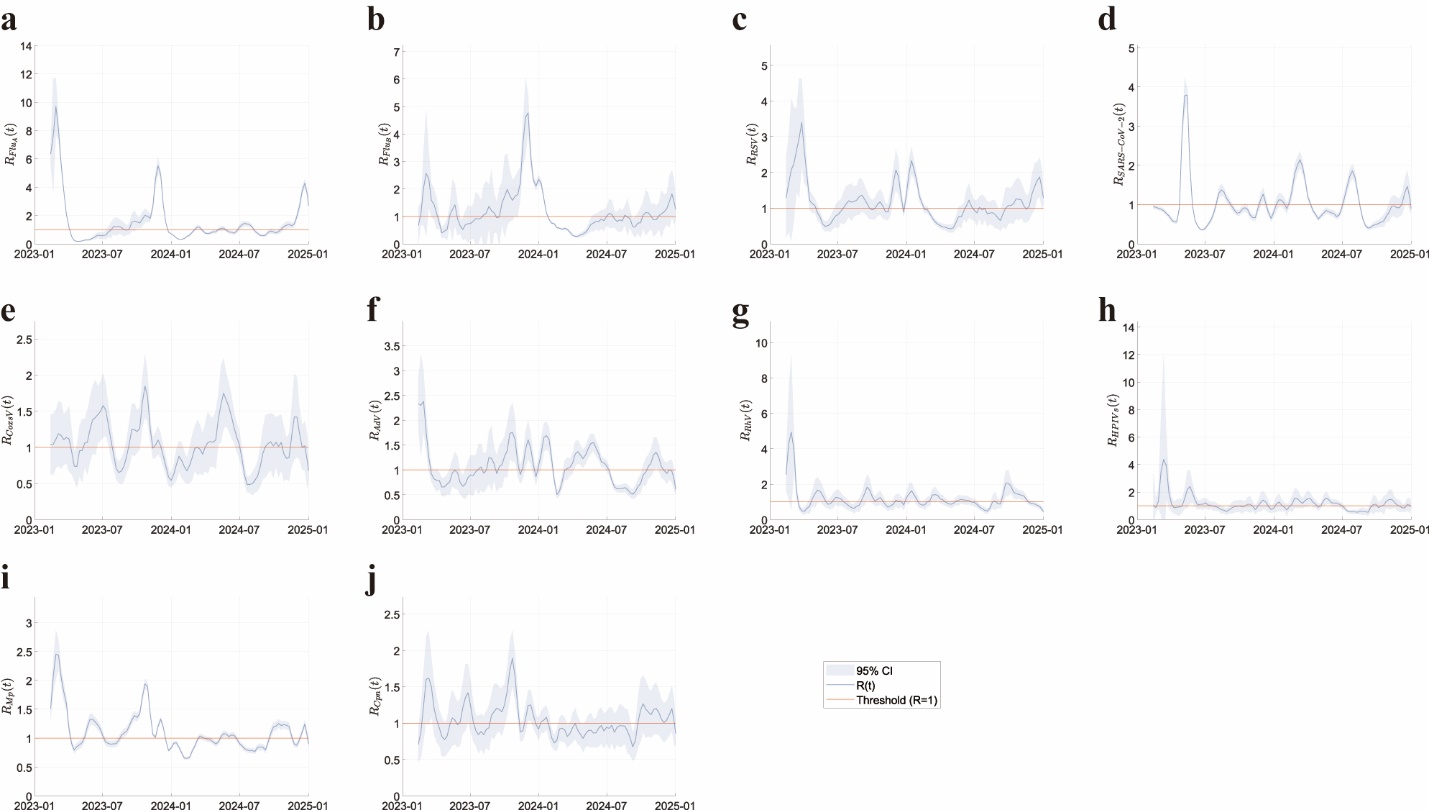


**Fig. S2 Time‑dependent reproduction numbers for single‑pathogen infections.**


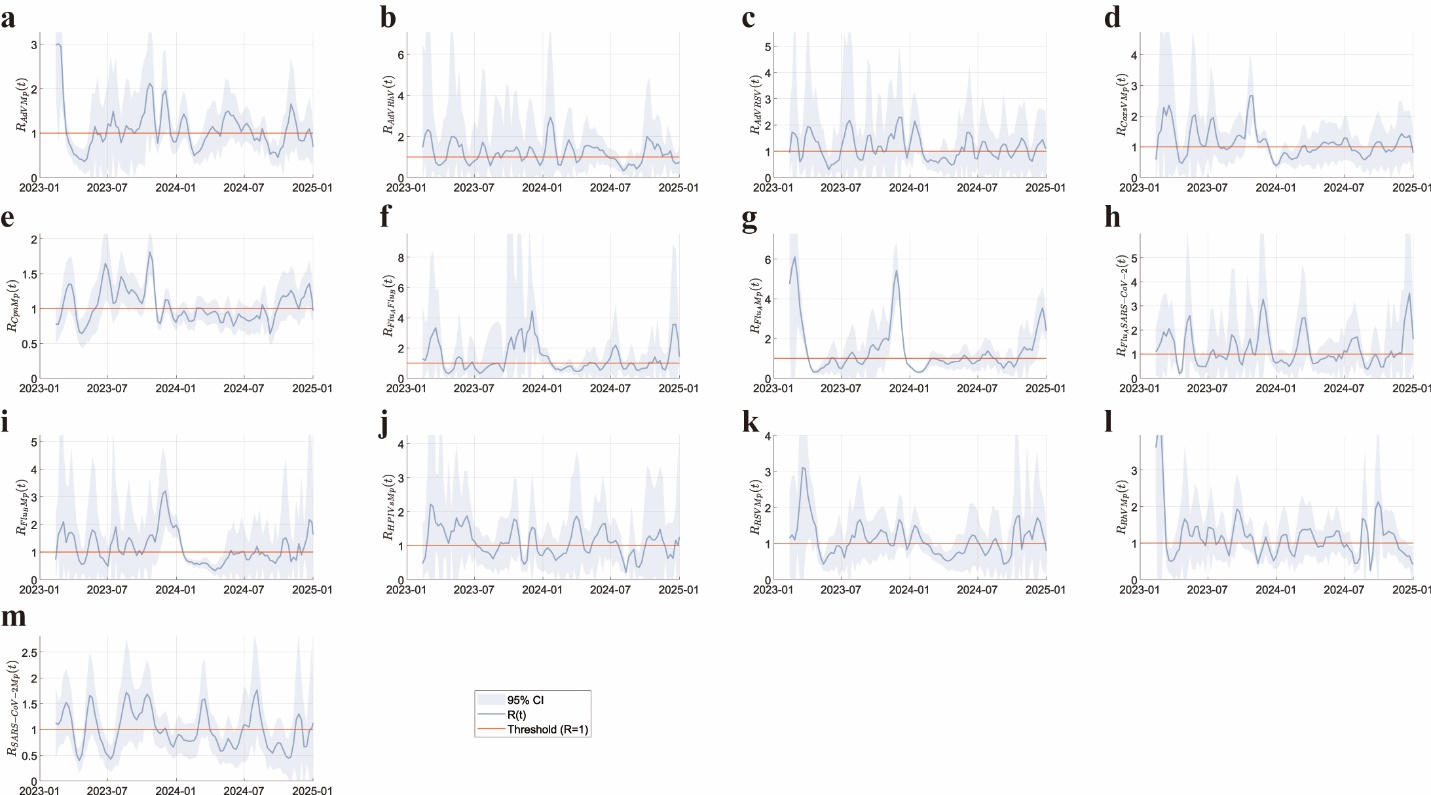


**Fig. S3 Time‑dependent reproduction numbers for co‑infecting pathogens.**

**Detailed calculation process for the basic reproduction number**

The simplified single-pathogen infection model based on model (1) is shown in Fig. S4. The three models a, b, and c in the figure have similar structures. We only discussed model a, as the other two models have similar properties. The differential equation system for model a is given by equation (2). Assuming that the DFE of the model (2) is .


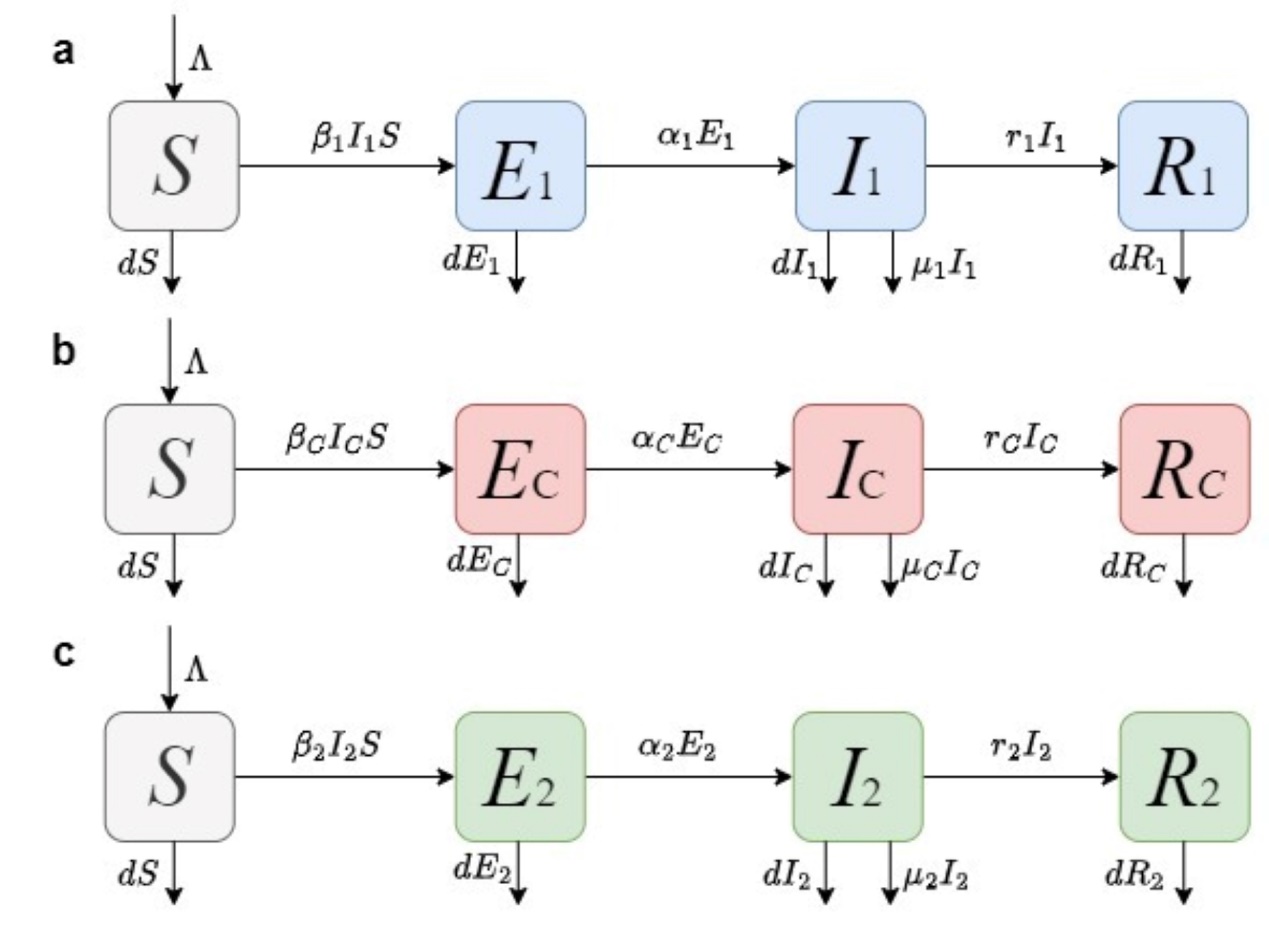


**Fig. S4 Single-path infection transmission dynamics model. The three models in the figure are simplified single-pathogen infection models obtained by completely blocking all cross-infection pathways between pathogens. (a)** represents the left column of model (1), where transmission is entirely dominated by Pathogen 1. **(b)** represents the middle column of model (1), where cross-infection between pathogens is completely ignored, and all co-infected individuals are infected solely by the co-infected individuals themselves. **(c)** represents the right column of model (1), where transmission is entirely dominated by pathogen 2.

(2)

Taking the partial derivatives with respect to each infectious compartment , we obtain the Jacobian matrices of and at DFE as follows:

Further solving for the inverse matrix of yields:

Then, the basic reproduction number of model (2) is the spectral radius of the next generation matrix . Direct calculation gives

Solving the above formula, we obtain the eigenvalues of the matrix as , . Based on the biological significance of the model parameters, the parameters and are all greater than or equal to 0, so . Therefore, the maximum eigenvalue of is , i.e., the spectral radius is . Therefore, the basic reproduction number of the model is

Similarly,

Further supplement the spectral radius calculation method of model (1). First, calculate and obtain:

Among them, Solving the above formula, we obtain the eigenvalues of the matrix as

Based on the biological significance of the model parameters, all parameters are greater than or equal to 0. Therefore, . Consequently, the maximum eigenvalue of the matrix is the maximum value of , , and , i.e., the spectral radius is the maximum value of , , and . Thus, the fundamental reproduction number of the entire system is

This is the maximum value of the basic reproduction number for the three simplified models.

**SI References**

1. Silva, C. J. & Torres, D. Modeling and optimal control of HIV/AIDS prevention through PrEP. *Discrete Contin. Dyn. Syst. Ser. S*. 11, 119–141 (2018).
2. Taylor, R. Interpretation of the correlation coefficient: a basic review. *J. Diagn. Med. Sonogr.* 6, 35–39 (1990).
3. Blower, S. M., Hartel, D. & Dowlatabadi, H., er al. Drugs, sex and HIV: a mathematical model for New York City. *Philos. Trans. R. Soc. Lond. B Biol. Sci.* 331, 171–187 (1991).
